# Supplementary material for: Kinetic insights into structure sensitivity of Ru catalyzed l-alanine hydrogenation to alaninol
Source: Royal Society of Chemistry journal article supplement (doi:10.1039/d4re00420e), 2024-10-17
Supplement: d4re00420e1.zip [file d4re00420e1.zip]

## Sheet: L-alanine converison
Catalysts	Temperature (℃)	Rin (molL-alanine·molRu-1·min-1)			Tem.	100	95	90	85			Loading	1	3	5	10
1.3-Ru/CNT	85	0.0230443		Paritcle size	1000/K	2.68097	2.71739	2.75482	2.7933	Activation Energy		Particle size	1.3	1.7	2.2	2.5
	90	0.0351728		2.5	ln(Rin)2.5	-2.35807	-2.69839	-3.11746	-3.43763	81.5632		Tof app	0.0957518	0.143591	0.208995	0.207758
	95	0.0491207		2.2	ln(Rin)2.2	-2.18757	-2.6039	-3.01348	-3.24904	79.0761		y_corner	0.26326	0.144811	0.0774948	0.0608273
	100	0.0709521		1.7	ln(Rin)1.7	-2.41749	-2.7732	-3.10386	-3.5161	80.5098		y_edge	0.470227	0.444376	0.379272	0.350984
1.7-Ru/CNT	85	0.029715		1.3	ln(Rin)1.3	-2.64575	-3.01348	-3.34748	-3.77034	82.3124		y_101	0.200811	0.317702	0.425584	0.462244
	90	0.0448757										y_001	0.0657022	0.0931102	0.117649	0.125875	MAX
	95	0.0624621										TOFcorner	0.363715	0.991576	2.69689	3.41553	3.41553
	100	0.0891449										TOFedge	0.203629	0.323129	0.551042	0.59193	0.59193
2.2-Ru/CNT	85	0.0388114										TOF101	0.476826	0.451967	0.491078	0.449455	0.491078
	90	0.0491207										TOF001	1.45736	1.54216	1.77643	1.65051	1.77643
	95	0.0739842										Normaliztion
	100	0.112189										corner	0.106489	0.290314	0.789596	1
2.5-Ru/CNT	85	0.0321407										edge	0.344009	0.545891	0.930925	1
	90	0.0442693										101	0.970978	0.920357	1	0.915241
	95	0.0673135										001	0.820388	0.868124	1	0.929114
	100	0.0946028

## Sheet: alaninol formation
Catalysts	Temperature (℃)	Rin (molAlaninol·molRu-1·min-1)			Tem.	100	95	90	85			Loading	1	3	5	10
1.3-Ru/CNT	85	0.0200121		Paritcle size	1000/K	2.68097	2.71739	2.75482	2.7933	Activation Energy		Particle size	1.3	1.7	2.2	2.5
	90	0.02547		2.5	ln(Rin)2.5	-2.35807	-2.69839	-3.11746	-3.43763	81.5632		Tof app	0.0744736	0.112921	0.179873	0.183426
	95	0.038205		2.2	ln(Rin)2.2	-2.18757	-2.6039	-3.01348	-3.24904	79.0761		y_corner	0.26326	0.144811	0.0774948	0.0608273
	100	0.05094		1.7	ln(Rin)1.7	-2.41749	-2.7732	-3.10386	-3.5161	80.5098		y_edge	0.470227	0.444376	0.379272	0.350984
1.7-Ru/CNT	85	0.0236507		1.3	ln(Rin)1.3	-2.64575	-3.01348	-3.34748	-3.77034	82.3124		y_101	0.200811	0.317702	0.425584	0.462301
	90	0.0369921										y_001	0.0657022	0.0931102	0.117649	0.125888	MAX
	95	0.0491207										TOFcorner	0.28289	0.779783	2.3211	3.01552	3.01552
	100	0.0770164										TOFedge	0.158378	0.254111	0.474258	0.522605	0.522605
2.2-Ru/CNT	85	0.029715										TOF101	0.370865	0.35543	0.422649	0.396767	0.422649
	90	0.0400243										TOF001	1.1335	1.21277	1.52889	1.45706	1.52889
	95	0.063675										Normalization
	100	0.0861128										corner	0.0938114	0.25859	0.769718	1
2.5-Ru/CNT	85	0.0278957										edge	0.303055	0.48624	0.907488	1
	90	0.0400243										101	0.877476	0.840959	1	0.938763
	95	0.05943										001	0.741388	0.793232	1	0.953013
	100	0.0715585
