# Supplementary material for: Kinetic insights into structure sensitivity of Ru catalyzed l-alanine hydrogenation to alaninol
Source: Royal Society of Chemistry journal article supplement (doi:10.1039/d4re00420e), 2024-10-17
Supplement: d4re00420e2.pdf [file d4re00420e2.pdf]

**Supplementary Information**

**Kinetics insights into structure sensitivity of Ru  
catalyzed L-alanine hydrogenation to alaninol**

*Rui Song,<sup>1</sup> Chang Yao,<sup>1</sup> Wenhua Li,<sup>1</sup> Nihong An,<sup>2</sup> Yafeng Shen,<sup>2,\*</sup> Nina Fei,<sup>1</sup> Xiaohu Ge,<sup>1</sup> Yueqiang Cao,<sup>1,3,\*</sup> Xuezhi Duan,<sup>1</sup> Xinggui Zhou,<sup>1</sup>*

*<sup>1</sup>State Key Laboratory of Chemical Engineering, School of Chemical Engineering, East China University of Science and Technology, 130 Meilong Road, Shanghai 200237, China*

*<sup>2</sup>Sino-Platinum Industrial Catalyst (Yunnan) Co., Ltd., 988 Keji Road, Kunming 650106, Yunnan, China*

*<sup>3</sup>Engineering Research Center of Resource Utilization of Carbon-containing Waste with Carbon Neutrality, Ministry of Education, Shanghai 200237, China*

*\* Corresponding authors: shenyf@ipm.com.cn; yqcao@ecust.edu.cn*

## Equation derivation

The derivation process of the total activation energy formula is as follows:

The total reaction rate  $r$  is represented by the sum of the reaction rate of each type of active sites:

$$r = \sum_1^n y_i r_i \#(1)$$

where  $n$  is the number of the type of active sites,  $y_i$  is the fraction of each type of active sites and  $r_i$  is the reaction rate of specific active sites.

Assume that the hydrogenation reaction rate expression of L-alanine is:

$$r = k c_1^{n_1} c_2^{n_2} \#(2)$$

where  $k$  is the reaction rate constant,  $c_1$  is the concentration of L-alanine and  $c_2$  is the concentration of  $H_2$ ,  $n_1$  and  $n_2$  are the reaction orders of L-alanine and  $H_2$  respectively.

Substituting Eq. 2 to Eq. 1 gives:

$$k c_1^{n_1} c_2^{n_2} = \sum_1^n y_i k_i c_1^{n_1} c_2^{n_2} \#(3)$$

Divide both sides of the Eq. 3 by  $c_1^{n_1} c_2^{n_2}$  gives:

$$k = \sum_1^n y_i k_i \#(4)$$

where  $k_i$  is the reaction rate constant of each type of active sites.

The reaction rate constant is also expressed by:

$$k = A \cdot \exp\left(-\frac{E_a}{RT}\right) \#(5)$$

where  $A$  is the pre-exponential factor,  $E_a$  is the activation energy,  $R$  is the universal gas constant and  $T$  is the absolute temperature.

Substituting Eq. 5 to Eq. 4 gives:

$$A \cdot \exp\left(-\frac{E_a}{RT}\right) = \sum_1^n y_i \cdot A_i \cdot \exp\left(-\frac{E_i}{RT}\right) \#(6)$$

The logarithm of Eq. 6 gives Eq. 7:

$$\ln A + \left(-\frac{E_a}{RT}\right) = \ln \left[ \sum_1^n y_i \cdot A_i \cdot \exp\left(-\frac{E_i}{RT}\right) \right] \#(7)$$

Taking the derivative of Eq. 7 with respect to  $T$  gives Eq. 8:

$$\left(\frac{1}{RT^2}\right) \cdot E_a = \left(\frac{1}{RT^2}\right) \cdot \frac{\sum_1^n \left[ y_i \cdot A_i \cdot \exp\left(-\frac{E_i}{RT}\right) \cdot E_i \right]}{\sum_1^n \left[ y_i \cdot A_i \cdot \exp\left(-\frac{E_i}{RT}\right) \right]} \#(8)$$

The simplification of Eq. 8 gives Eq. 9:

$$E_a = \frac{\sum_1^n \left[ y_i \cdot A_i \cdot \exp\left(-\frac{E_i}{RT}\right) \cdot E_i \right]}{\sum_1^n \left[ y_i \cdot A_i \cdot \exp\left(-\frac{E_i}{RT}\right) \right]} \#(9)$$

## Model calculations

The total number of Ru atoms ( $N_T$ ) in nanoparticles can be calculated from Eq. 10:

$$d_{Ru\ particle} = 1.105 \times N_T^{\frac{1}{3}} \times d_{Ru} \#(10)$$

where  $d_{Ru\ particle}$  is the statistical average particle size of Ru nanoparticles, and  $d_{Ru}$  is the diameter of Ru atom. The number of atoms locating on the equivalent edge (corners included)  $m$  can be given by Eq. 11:

$$N_T = 0.25 \times (14m^3 - 21m^2 + 14m - 4) \#(11)$$

The number of atoms on different active sites of each Ru particle can be calculated from Eq. 12 -Eq. 15:

$$N_{corner} = 12 \#(12)$$

$$N_{edge} = 18m - 40 \#(13)$$

$$N_{(001)} = 1.5 \times (m - 2)^2 \#(14)$$

$$N_{(101)} = 6m^2 - 26m + 28 \#(15)$$

The surface atom number of each Ru particle can be obtained from Eq. 16:

$$N_S = 7.5m^2 - 14m + 6 \#(16)$$

The reaction rate for L-alanine conversion or alaninol formation and apparent activation energy were calculated using Eq. 17 and Eq. 18:

$$r_{initial} = \frac{\frac{dn_{L-alanine/Alaninol}}{dt_{initial}}}{\frac{amount \times loading_{Ru}}{M_{Ru}}} \#(17)$$

$$TOF_{app} = \frac{r_{initial}}{\frac{N_S}{N_T}} \#(18)$$

where  $amount$ ,  $loading_{Ru}$  and  $M_{Ru}$  are the amount of catalyst, the loading of Ru and the molecular weight of Ru, respectively, while  $n_{L-alanine}$  and  $n_{Alaninol}$  are the number of moles of L-alanine and alaninol, respectively.

**Table S1.** Initial reaction rate for L-alanine conversion on Ru/CNT catalysts at different temperatures.

| Catalysts  | Temperature (°C) | $R_{in}$ (mol <sub>L-alanine</sub> ·mol <sub>Ru</sub> <sup>-1</sup> ·min <sup>-1</sup> ) |
|------------|------------------|------------------------------------------------------------------------------------------|
| 1.3-Ru/CNT | 85               | 0.023                                                                                    |
|            | 90               | 0.035                                                                                    |
|            | 95               | 0.049                                                                                    |
|            | 100              | 0.071                                                                                    |
| 1.7-Ru/CNT | 85               | 0.030                                                                                    |
|            | 90               | 0.045                                                                                    |
|            | 95               | 0.062                                                                                    |
|            | 100              | 0.089                                                                                    |
| 2.2-Ru/CNT | 85               | 0.039                                                                                    |
|            | 90               | 0.049                                                                                    |
|            | 95               | 0.074                                                                                    |
|            | 100              | 0.112                                                                                    |
| 2.5-Ru/CNT | 85               | 0.032                                                                                    |
|            | 90               | 0.044                                                                                    |
|            | 95               | 0.067                                                                                    |
|            | 100              | 0.095                                                                                    |

**Table S2.** Initial rate of alaninol formation on Ru/CNT catalysts at different temperatures.

| Catalysts  | Temperature (°C) | $R_{in}$ ( $\text{mol}_{\text{Alaninol}} \cdot \text{mol}_{\text{Ru}}^{-1} \cdot \text{min}^{-1}$ ) |
|------------|------------------|-----------------------------------------------------------------------------------------------------|
| 1.3-Ru/CNT | 85               | 0.020                                                                                               |
|            | 90               | 0.025                                                                                               |
|            | 95               | 0.038                                                                                               |
|            | 100              | 0.051                                                                                               |
| 1.7-Ru/CNT | 85               | 0.024                                                                                               |
|            | 90               | 0.037                                                                                               |
|            | 95               | 0.049                                                                                               |
|            | 100              | 0.077                                                                                               |
| 2.2-Ru/CNT | 85               | 0.030                                                                                               |
|            | 90               | 0.040                                                                                               |
|            | 95               | 0.064                                                                                               |
|            | 100              | 0.086                                                                                               |
| 2.5-Ru/CNT | 85               | 0.028                                                                                               |
|            | 90               | 0.040                                                                                               |
|            | 95               | 0.059                                                                                               |
|            | 100              | 0.072                                                                                               |

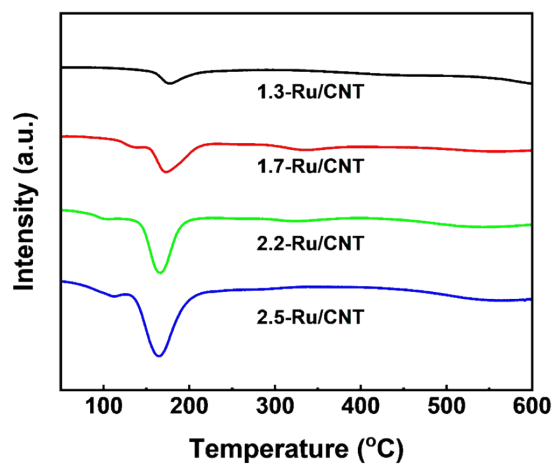

**Figure S1.** H<sub>2</sub>-TPR profiles of differently sized Ru/CNT catalysts.

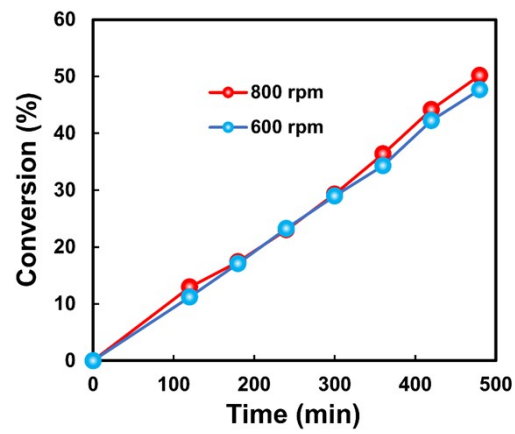

**Figure S2.** L-alanine conversion as a function of time over the 2.2-Ru/CNT catalyst at 95 °C.



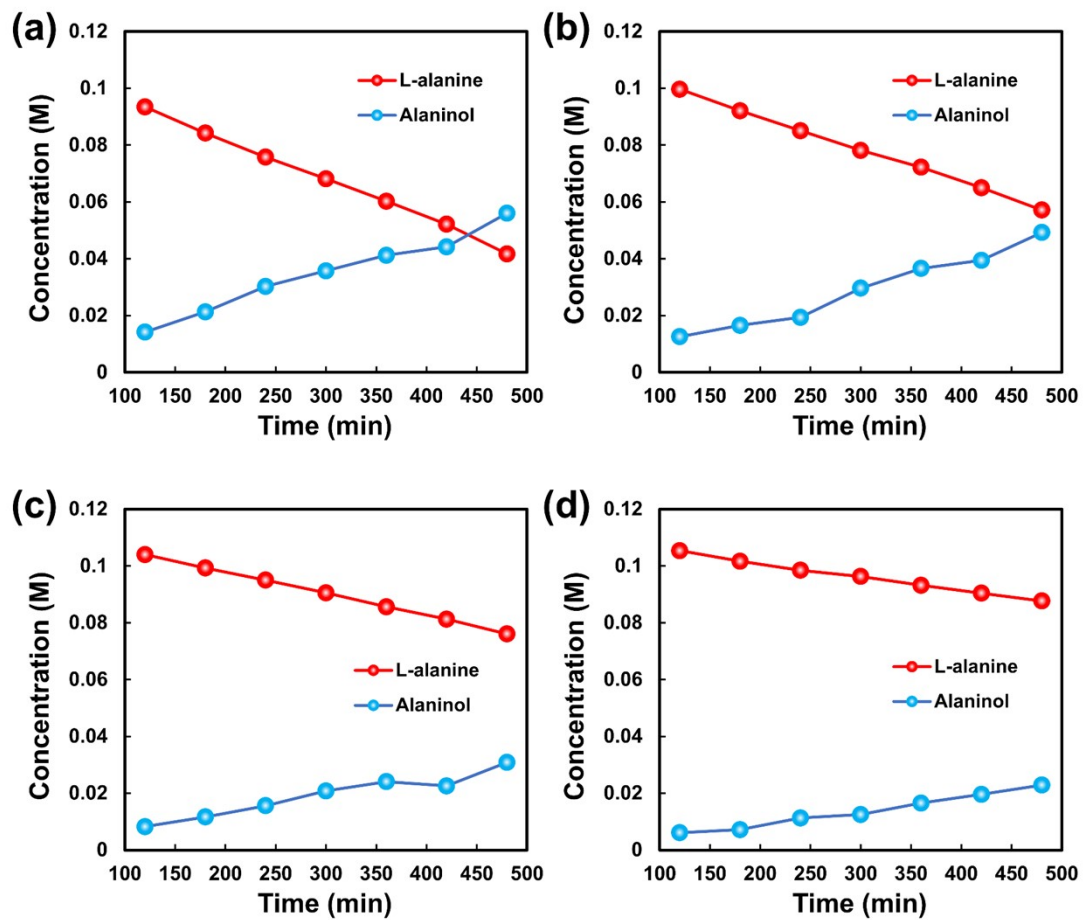

**Figure S3.** Concentrations of L-alanine and alaninol versus reaction time for L-alanine hydrogenation over the 2.5-Ru/CNT catalyst at (a) 100 °C, (b) 95 °C, (c) 90 °C and (d) 85 °C.

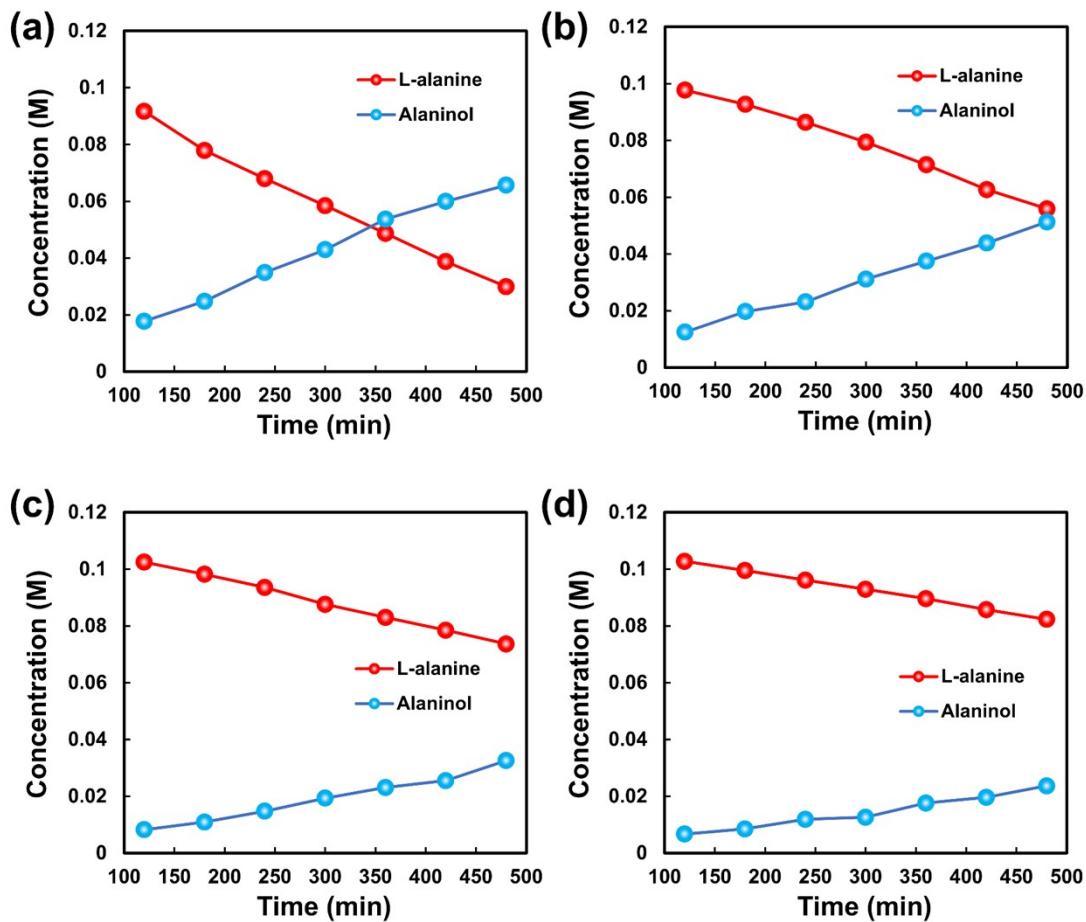

**Figure S4.** Concentrations of L-alanine and alaninol versus reaction time for L-alanine hydrogenation over the 2.2-Ru/CNT catalyst at (a) 100 °C, (b) 95 °C, (c) 90 °C and (d)

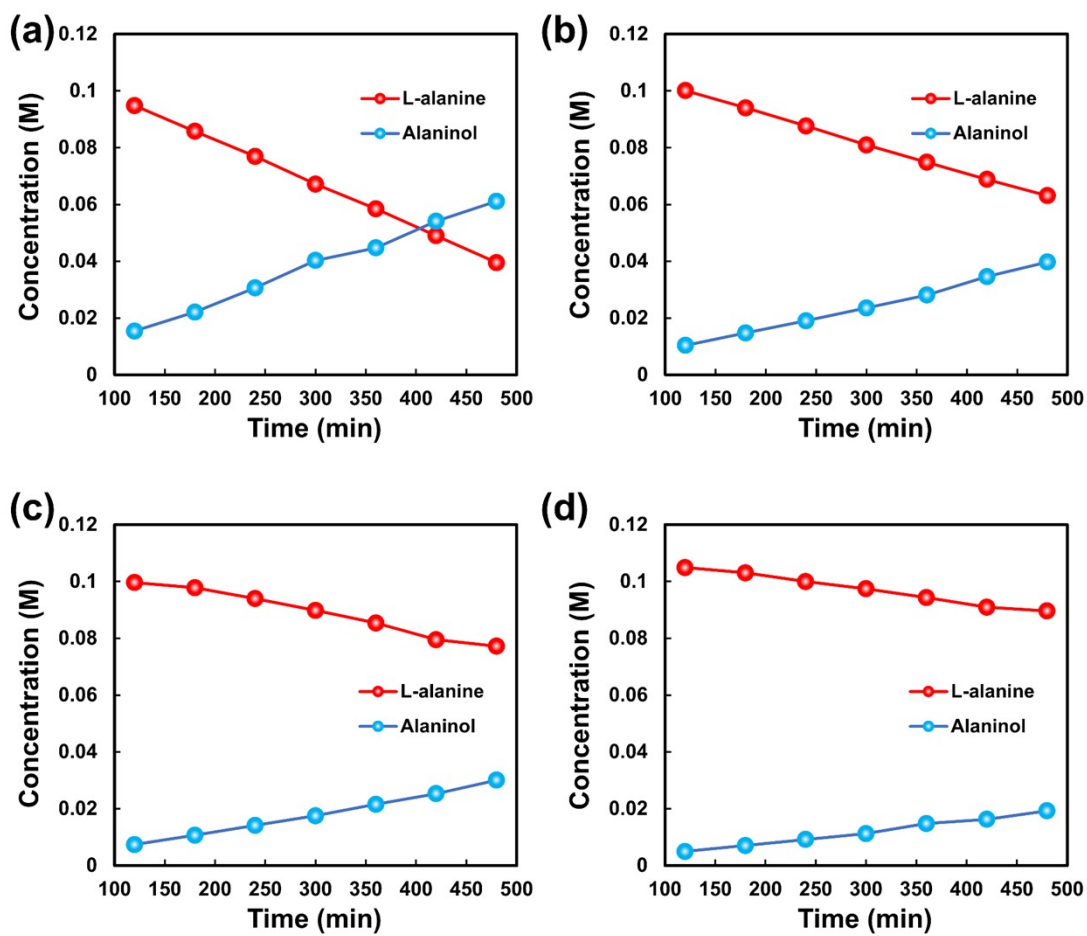

**Figure S5.** Concentrations of L-alanine and alaninol versus reaction time for L-alanine hydrogenation over the 1.7-Ru/CNT catalyst at (a) 100 °C, (b) 95 °C, (c) 90 °C and (d) 85 °C.

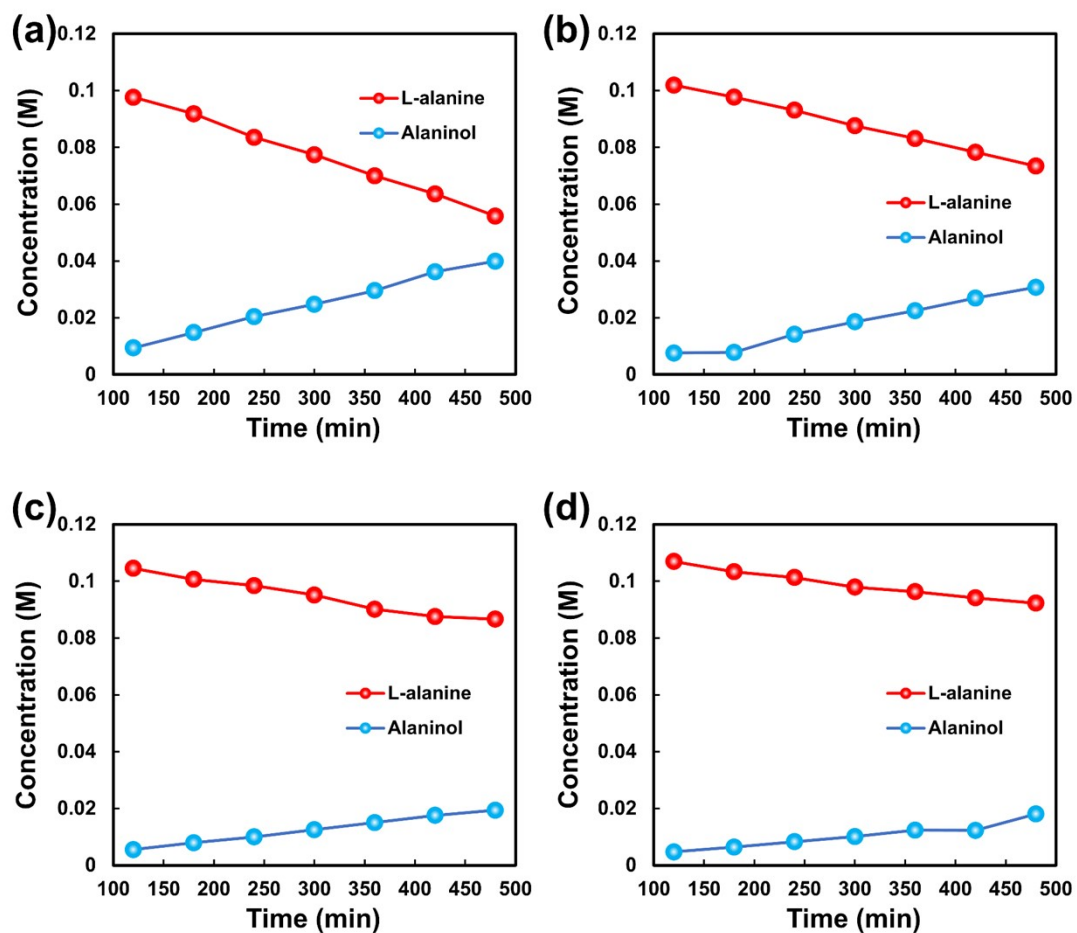

**Figure S6.** Concentrations of L-alanine and alaninol versus reaction time for L-alanine hydrogenation over the 1.3-Ru/CNT catalyst at (a) 100 °C, (b) 95 °C, (c) 90 °C and (d)

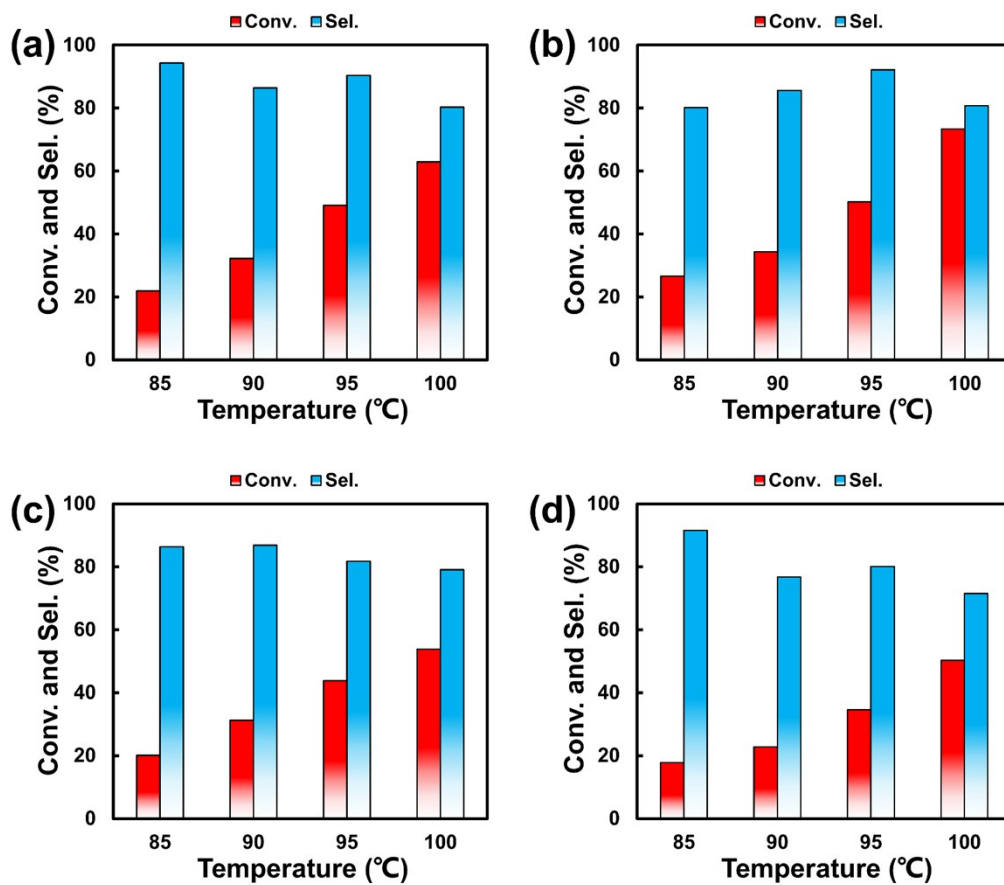

**Figure S7.** Conversion of L-alanine and selectivity to alaninol over (a) 2.5-Ru/CNT, (b) 2.2-Ru/CNT, (c) 1.7-Ru/CNT and (d) 1.3-Ru/CNT at 480 min.

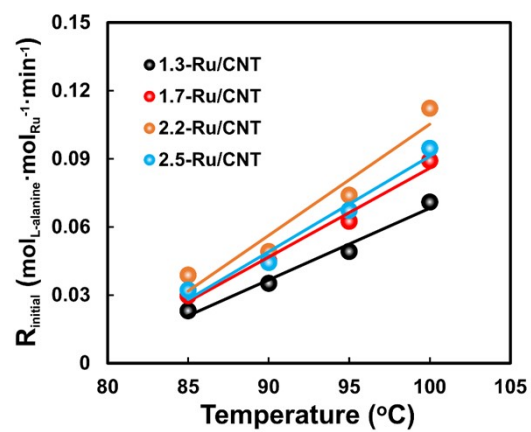

**Figure S8.** Plots of  $R_{\text{initial}}$  for L-alanine conversion over differently sized Ru/CNT catalysts as a function of temperature.

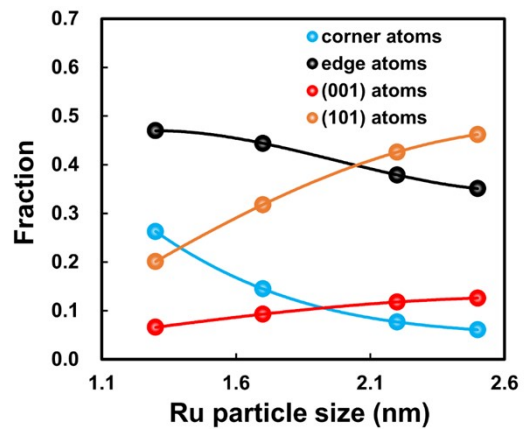

**Figure S9.** The fraction of different type of surface sites as a function of the Ru particle size.

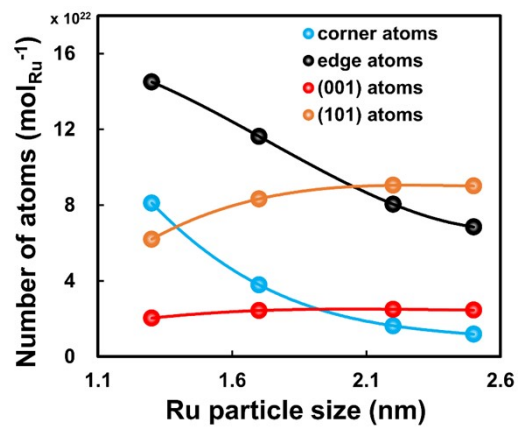

**Figure S10.** The number of each type of active site per mole of Ru as a function of the Ru particle size.



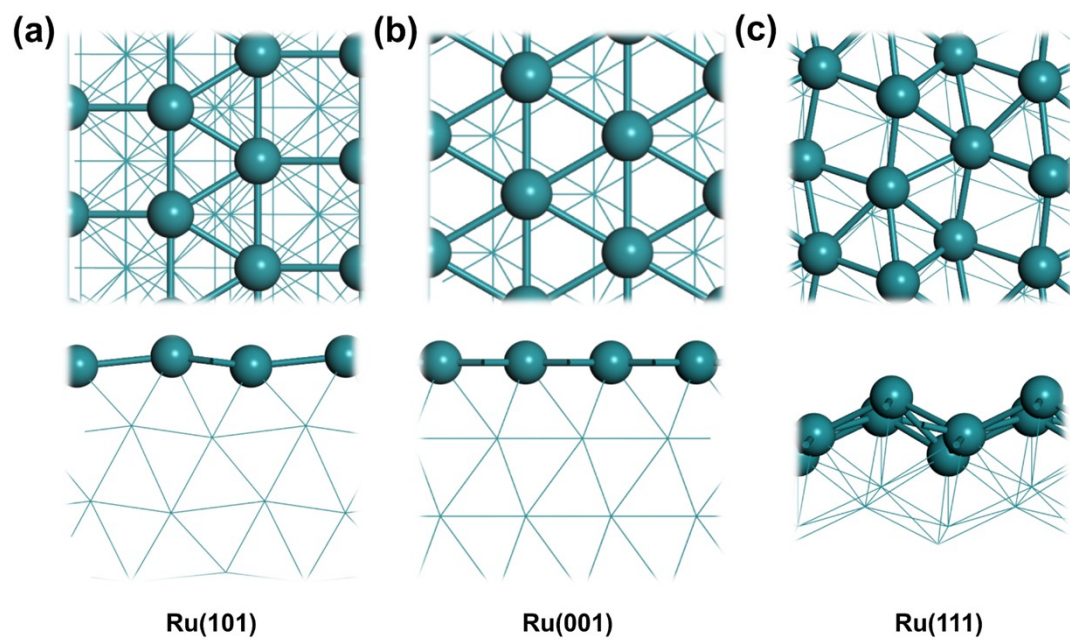

**Figure S11.** Schematic diagrams of clean (a) Ru(101), (b) Ru(001) and (c) Ru(111) surfaces.

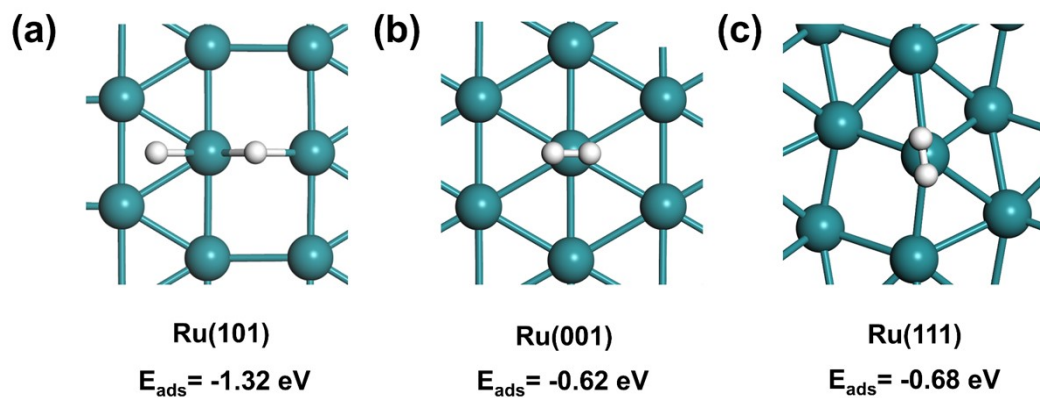

**Figure S12.** Adsorption energies and configurations of  $\text{H}_2$  on the Ru(101), Ru(001) and Ru(111) surfaces.
